# Supplementary material for: pLDDT Values in AlphaFold2 Protein Models Are Unrelated to Globular Protein Local Flexibility
Source: MDPI journal article supplement (doi:10.3390/cryst13111560), 2023-11-01
Supplement: s1 [file s1]

## Supplementary Material

**Table S1.** List of the protein crystal structures examined in the present study. They are identified by the four-letter Protein Data Bank identification code, followed by the chain identifier.

### Room set

1kv0\_A 1mf4\_A 1ns9\_B 1tgm\_A 2ftb\_A 2yvb\_A 3oq7\_A 3oxr\_B 3wxq\_A 4b9o\_A 4i65\_A 4jyq\_A 4npe\_A 4z2q\_A 5ai3\_A 5d6u\_A 5eet\_A 5vg0\_A 6f0d\_B 6pw8\_A 6shr\_A 6w3w\_A

### Cryo set

1i5g\_A 1izh\_A 1nme\_A 1nme\_B 1nte\_A 1o0h\_A 1oai\_A 1ogt\_B 1ooh\_A 1oow\_A 1pzi\_D 1ruw\_A 1sj1\_A 1t1v\_A 1t2h\_A 1tgr\_A 1tm1\_I 1uku\_A 1uxz\_A 1vkq\_A 1xb6\_A 1xw3\_A 1y0m\_A 1y2t\_A 1zeq\_X 1zt3\_A 2a7b\_A 2apf\_A 2atb\_A 2awg\_A 2axw\_A 2ayd\_A 2b8i\_A 2blf\_B 2bo1\_A 2boj\_A 2c1d\_B 2cg6\_A 2d02\_A 2dt4\_A 2e0q\_A 2e5y\_A 2fc3\_A 2fe5\_A 2frg\_P 2g64\_A 2hba\_A 2i4a\_A 2i6v\_A 2inc\_C 2j6b\_A 2j7j\_A 2j9v\_A 2nwd\_X 2o9v\_A 2oaw\_A 2oya\_A 2oyp\_A 2p1h\_A 2pko\_A 2pne\_A 2pos\_A 2py0\_A 2q5b\_A 2qfk\_A 2qpz\_A 2qsk\_A 2r6q\_A 2rcq\_A 2uux\_A 2v9v\_A 2vim\_A 2vk3\_A 2vn6\_B 2wc6\_A 2wfb\_A 2wlv\_A 2wnd\_A 2wzo\_A 2xhh\_A 2xrh\_A 2xxn\_A 2yhf\_A 2z58\_B 2z5e\_A 2z7f\_I 2zdp\_A 2zqo\_A 3a6q\_A 3a7l\_A 3ab5\_A 3agn\_A 3aj4\_A 3alb\_A 3b1l\_X 3bom\_B 3cjk\_A 3cjk\_B 3d78\_A 3dj9\_A 3eg2\_A 3f01\_A 3f3q\_A 3f45\_A 3fbl\_A 3ff5\_A 3fju\_B 3fp5\_A 3g26\_A 3g98\_A 3gsh\_A 3gwm\_A 3hak\_A 3hh7\_A 3ipj\_A 3jzz\_A 3k1x\_A 3k6d\_A 3kan\_A 3kt9\_A 3lky\_A 3mcb\_A 3mcb\_B 3mx7\_A 3neq\_A 3o1f\_B 3op8\_A 3po1\_B 3qdo\_A 3qr7\_A 3r0n\_A 3r65\_A 3rs1\_A 3sk2\_A 3teu\_A 3u3g\_D 3uej\_A 3ui5\_A 3vnw\_A 3wea\_A 3wfv\_A 3wuz\_A 3zi8\_A 3zr8\_X 4al9\_A 4bvv\_A 4d3p\_A 4dro\_A 4e5r\_A 4eq1\_A 4f8k\_A 4fd9\_A 4g9s\_B 4gof\_A 4grn\_A 4gvc\_A 4haa\_A 4i3c\_A 4inw\_A 4ion\_A 4j5q\_A 4jh1\_A 4mjd\_A 4mre\_A 4mth\_A 4nds\_A 4npd\_A 4o0a\_A 4p5r\_A 4pe7\_A 4pmf\_A 4qag\_A 4qbs\_A 4qpw\_A 4rgd\_A 4rra\_A 4whi\_A 4wqq\_A 4wvv\_A 4x3k\_A 4xhv\_A 4xpw\_A 4xqm\_A 4y0y\_I 4y2i\_A 4y5d\_A 4y88\_A 4y9i\_A 4ypc\_A 4z8a\_A 4zes\_A 5aa7\_A 5b3i\_A 5b3k\_A 5b3p\_A 5by8\_B 5cmo\_A 5do6\_A 5e0z\_A 5e10\_A 5e9p\_A 5eip\_A 5el2\_A 5eop\_A 5epb\_A 5fds\_A 5ffl\_A 5gu8\_A 5gvy\_A 5h3v\_A 5hb7\_A 5ht9\_A 5it6\_A 5j0f\_A 5k2l\_A 5m6o\_A 5mg2\_A 5mh2\_A 5mjd\_A 5n88\_E 5nfm\_A 5nhx\_A 5njo\_A 5nw3\_A 5oi7\_A 5ojw\_B 5ol4\_B 5onm\_A 5svy\_A 5tab\_A 5tdw\_A 5vbk\_A 5wxg\_A 5wzo\_A 5x2e\_A 5xb0\_A 5xmo\_A 5ydn\_A 5yhm\_K 5yhy\_A 5yiu\_A 5ym7\_A 5yob\_A 5yre\_A 6avj\_A 6b94\_A 6blm\_A 6c4s\_A 6csl\_A 6elm\_A 6exx\_A 6ff1\_A 6flh\_A 6fsg\_A 6g8y\_A 6h8o\_A 6h9e\_A 6hqc\_A 6i1m\_A 6iy4\_I 6iyh\_A 6jb9\_A 6kmc\_A 6kxt\_A 6l34\_A 6lcq\_A 6lje\_A 6lu5\_A 6mgn\_A 6miu\_A 6o56\_A 6p43\_B 6qvh\_A 6rnz\_A 6rrv\_A 6rzy\_A 6s3f\_A 6sso\_A 6tg6\_A 6tyq\_A 6ufv\_A 6vrr\_A 6wi6\_A 6zuq\_A 7b5j\_A 7b7b\_A 7bng\_A 7cio\_A 7czj\_A 7dc0\_A 7dvc\_A 7ead\_A 7eg5\_A 7jue\_A 7l9l\_A 7m59\_A 7o4c\_A 7og8\_A 7oxw\_A 7pr7\_B 7tng\_A 7vd7\_A 7vql\_A 7ww5\_A 7xpw\_A 7zaq\_A 8aj7\_A 8dky\_A
